# Supplementary material for: Do T2DM and Hyperglycaemia Affect the Expression Levels of the Regulating Enzymes of Cellular O-GlcNAcylation in Human Saphenous Vein Smooth Muscle Cells?
Source: MDPI journal article supplement (doi:10.3390/diabetology5020013), 2024-04-25
Supplement: s1 [file s1]

### Supplementary document

**Table S1. Patients' characteristics with medication history and sample ID number**

| <b>Patient ID</b>     | <b>Age</b> | <b>Sex</b> | <b>Ethnic origin</b> | <b>Reason for surgery</b>                      | <b>Medical History</b>                                         | <b>T2DM</b> | <b>Medication history</b>                                                                |
|-----------------------|------------|------------|----------------------|------------------------------------------------|----------------------------------------------------------------|-------------|------------------------------------------------------------------------------------------|
| <b>TP-<br/>HSV001</b> | 69         | Male       | British White        | Coronary artery disease                        | T2DM, hypertension, hypercholesterolaemia                      | Yes         | Metformin, atorvastatin, bisoprolol                                                      |
| <b>TP-<br/>HSV002</b> | 70         | Male       | British White        | Coronary artery disease                        | Hypertension, hypercholesterolaemia.                           | No          | Aspirin, metformin, ramipril, ISMN, rosuvastatin, omeprazole, dapagliflozin              |
| <b>TP-<br/>HSV003</b> | 84         | Male       | British White        | Coronary artery disease                        | Hypertension, hypercholesterolaemia                            | No          | Aspirin, amlodipine, atorvastatin, bisoprolol                                            |
| <b>TP-<br/>HSV004</b> | 73         | Male       | British White        | Coronary artery disease, aortic valve stenosis | Heart attack, peripheral vascular disease, rectal cancer       | No          | Allopurinol, clopidogrel, latanoprost, ramipril                                          |
| <b>TP-<br/>HSV005</b> | 58         | Male       | British              | Coronary artery disease, recent MI: Jan 2020   | Heart attack, hypertensive, asthmatic                          | No          | Aspirin, ticagrelor, isosorbide dinitrate, bisoprolol, ramipril, atorvastatin, spiromax. |
| <b>TP-<br/>HSV006</b> | 77         | Male       | British              | Coronary artery disease                        | T2DM, MI (2000), Basal cell carcinoma (removed), IHD, epilepsy | Yes         | Carbamazepine, verapamil, rosuvastatin, clopidogrel                                      |
| <b>TP-<br/>HSV007</b> | 66         | Male       | British              | Coronary artery disease                        | MI (2000), hypothyroidism, myeloid dysplasia disorder          | No          | Amlodipine, nicorandil, perindopril                                                      |
| <b>TP-<br/>HSV008</b> | 61         | Male       | White                | Triple vessel disease                          | High cholesterol                                               | No          | Aspirin, bisoprolol, isosorbide mononitrate, atorvastatin, amlodipine, sertraline        |

|                       |    |      |                  |                         |                                                                                                         |     |                                                                                                                      |
|-----------------------|----|------|------------------|-------------------------|---------------------------------------------------------------------------------------------------------|-----|----------------------------------------------------------------------------------------------------------------------|
| <b>TP-<br/>HSV009</b> | 69 | Male | Caucasian        | Coronary artery disease | Heart attacks (2003), BPH,<br>Cholesterol +HTL                                                          | No  | Aspirin, bisoprolol, colecalciferol,<br>eplerenone, ESMN, ramipril<br>atorvastatin, ranitidine, tamsulosin           |
| <b>TP-<br/>HSV010</b> | 68 | Male | White<br>British | Coronary artery disease | T2DM, hypertension,<br>hypercholesterolaemia                                                            | Yes | Metformin, atorvastatin,<br>bisoprolol                                                                               |
| <b>TP-<br/>HSV011</b> | 69 | Male | White            | Coronary artery disease | T2DM, heart attack,<br>hypercholesterolaemia                                                            | Yes | Bisoprolol, atorvastatin,<br>amlodipine, omeprazole,<br>metformin and aspirin                                        |
| <b>TP-<br/>HSV012</b> | 73 | Male | White            | Coronary artery disease | High cholesterol                                                                                        | No  | Isorsorbide(stopped due to<br>surgery), bisoprolol, aspirin,<br>allopurinol, tamsulosin,<br>simvastatin and ramipril |
| <b>TP-<br/>HSV013</b> | 48 | Male | White            | Coronary artery disease | Heart attack (August<br>2020), Kidney failure,<br>Asthma,<br>hypercholesterolaemia and<br>recent sepsis | No  | Carvedilol, furosemide,<br>salbutamol, doxazosin,<br>atovastatin, lansoprazole and<br>ISMN                           |
| <b>TP-<br/>HSV014</b> | 69 | Male | White            | Worsening angina        | Not Known                                                                                               |     | Isorsorbide mononitrate,<br>bisoprolol, aspirin, atovastatin and<br>ramipril                                         |
| <b>TP-<br/>HSV015</b> | 54 | Male | White            | Coronary artery disease | Heart attack                                                                                            | No  | Ramipril, atorvastatin,<br>lansoprazole, aspirin, apixaban<br>and lercanidipine                                      |
| <b>TP-<br/>HSV016</b> | 80 | Male | White            | Coronary artery disease | T2DM, Prostate CA, HTN,<br>Carotid Artery disease                                                       | Yes | Clopidogrel, bisoprolol,<br>amlodipine, ISMN atorvastatin,<br>Lansoprazole, Ranolazine,<br>tamsulosin                |

|                       |    |      |                  |                                |                                                                                   |     |                                                                                                                                                                     |
|-----------------------|----|------|------------------|--------------------------------|-----------------------------------------------------------------------------------|-----|---------------------------------------------------------------------------------------------------------------------------------------------------------------------|
| <b>TP-<br/>HSV017</b> | 73 | Male | White<br>British | Coronary artery disease        | Hypertension                                                                      | No  | Isorsorbide mononitrate, atenolol, amlodipine, atorvastatin, clopidogrel and nitrolingual pump spray                                                                |
| <b>TP-<br/>HSV018</b> | 63 | Male | White<br>British | Coronary artery disease        | T2DM,<br>hypercholesterolaemia                                                    | Yes | Empagliflozin, Humilin mix, aspirin, losartan, amlodipine, atorvastatin and Sukkarto SR                                                                             |
| <b>TP-<br/>HSV019</b> | 63 | Male | White<br>British | Double Coronary vessel disease | Heart attack, Carpal tunnel syndrome, Osteoarthritis, Hypertension, Varicose vein | No  | Empagliflozin, Carvedilol, Omeprazole, Glyceryl trinitrate, Cocodamol, Lactulose, Aspirin, Ramipril, Ezetimibe, Tildem Retard, Furosemide and Fenbid Firt (10% Gel) |
| <b>TP-<br/>HSV020</b> | 68 | Male | White            | Coronary artery disease        | Heart attack, left knee replacement, Osteoarthritis                               | No  | Amlodipine, Gabapentin, Aspirin, Bisoprolol, Atorvastatin and Omeprazole                                                                                            |
| <b>TP-<br/>HSV021</b> | 74 | Male | White            | Coronary artery disease        | Heart attack, Perivascular vascular disease, Rheumatoid and Osteoarthritis        | No  | Amlodipine, Lanzoprazole, Citalopram, Paracetamol, Aspirin, Loperamide, Ramipril, Atorvastatin and Isorsorbide mononitrate                                          |
| <b>TP-<br/>HSV022</b> | 68 | Male | White<br>British | Coronary artery disease        | Hypertension,<br>Hypercholesterolemia                                             | No  | Aspirin, Bisoprolol, Atorvastatin and Omeprazole                                                                                                                    |
| <b>TP-<br/>HSV023</b> | 72 | Male | White            | Coronary artery disease        | T2DM, Gout, GORD, Hypertension, Hypercholesterolemia and BPH                      | Yes | Amlodipine, Lansoprazole, Clopidogrel, Doxazosin, Spironolactone, Atorvastatin, Finasteride, Allopurinol and Lercanidipine                                          |

|                       |    |      |                  |                                                             |                                                                                             |     |                                                                                                                                     |
|-----------------------|----|------|------------------|-------------------------------------------------------------|---------------------------------------------------------------------------------------------|-----|-------------------------------------------------------------------------------------------------------------------------------------|
| <b>TP-<br/>HSV024</b> | 63 | Male | White<br>British | Coronary artery disease                                     | T2DM and heart attack                                                                       | Yes | Aspirin, Bisoprolol, Atorvastatin,<br>Lanzoprazole and Ramipril.                                                                    |
| <b>TP-<br/>HSV025</b> | 73 | Male | White<br>British | Coronary artery disease                                     | Heart attack and<br>hypertension                                                            | No  | Ticagrelor, Amlodipine,<br>Lanzoprazole, Deltapapin,<br>Pantoprazole, Aspirin, Ramipril,<br>Atorvastatin and Bisoprolol.            |
| <b>TP-<br/>HSV026</b> | 70 | Male | White            | Triple vessel disease                                       | Covid 19 +ve, now -ve                                                                       | No  | Aspirin, Bisoprolol, Bimatropost<br>and Ramipril                                                                                    |
| <b>TP-<br/>HSV027</b> | 76 | Male | White<br>British | Coronary artery disease-<br>recent myocardial<br>infarction | Heart attack,<br>Hypercholesterolemia and<br>Gout                                           | No  | Throxin, atorvastatin, calcisine<br>and lansoprazol                                                                                 |
| <b>TP-<br/>HSV028</b> | 52 | Male | White            | Coronary artery disease                                     | Heart attack and<br>Hypercholesterolemia                                                    | No  | Isosorbide mononitrate. Aspirin,<br>Ramipril and Atorvastatin                                                                       |
| <b>TP-<br/>HSV029</b> | 75 | Male | White<br>British | Coronary artery disease                                     | T2DM, Hypertension,<br>Parkinson and<br>Dyslipidaemia                                       | Yes | Lansoprazole, metformin, aspirin,<br>bisoprolol, co-caveldopa,<br>furosemid, gliclizide, irbesatan,<br>simvastatin and sitagliptin. |
| <b>TP-<br/>HSV030</b> | 59 | Male | White<br>British | Coronary artery disease                                     | Heart attack (2018)                                                                         | No  | Omeprazole, Losartan,<br>Paracetamol, Aspirin, Oxycodone,<br>Atorvastatin, isorsorbide<br>mononitrate, and Bisoprolol.              |
| <b>TP-<br/>HSV031</b> | 72 | Male | White<br>British | Coronary artery disease                                     | Sleep apnea, Gout,<br>Diverticulosis, Bilateral<br>osteoarthritis, shoulder<br>replacement. | No  | Allopurinol, Bisoprolol,<br>Amiodarone, Furosemide,<br>Lanzoprazole, Atorvastatin,<br>isosorbide mononitrate, and<br>Malirogol.     |

|                       |    |      |                  |                         |                                                               |     |                                                                                                                                                                                           |
|-----------------------|----|------|------------------|-------------------------|---------------------------------------------------------------|-----|-------------------------------------------------------------------------------------------------------------------------------------------------------------------------------------------|
| <b>TP-<br/>HSV032</b> | 55 | Male | White<br>British | Coronary artery disease | Heart attack                                                  | No  | Bisoprolol, Ramipril,<br>Aspirin,Ticagrelor, Atovastatin,<br>isosorbide mononitrate and<br>Vitamin D3                                                                                     |
| <b>TP-<br/>HSV033</b> | 57 | Male | White<br>British | Coronary artery disease | Heart attack, Hypertension<br>and Hypercholesterolemia        | No  | Aspirin, Amlodipine,Atorvastatin,<br>Ramipril and Bisoprolol                                                                                                                              |
| <b>TP-<br/>HSV034</b> | 82 | Male | White<br>British | Coronary artery disease | Cancer                                                        | No  | Aspirin,Atorvastatin, isosorbide<br>mononitrate, omeprazole,<br>lactulose and paracetamol                                                                                                 |
| <b>TP-<br/>HSV035</b> | 53 | Male | White<br>British | Coronary artery disease | Heart attack, kidney<br>failure.                              | No  | Aspirin,Atorvastatin, isosorbide<br>dinitrate, Budesonide,<br>Clopidogrel, Lansoprazole,<br>Losartan, metoprolol, and<br>venlafaxine                                                      |
| <b>TP-<br/>HSV037</b> | 65 | Male | White<br>British | Coronary artery disease | Hypertension and<br>hypercholesterolaemia                     | No  | Amlodipine, atorvastatin,<br>bisoprolol, ISMN and losartan.                                                                                                                               |
| <b>TP-<br/>HSV038</b> | 63 | Male | White<br>British | Coronary artery disease | T2DM, Heart attack,<br>Recent infection and<br>Osteoarthritis | Yes | Lansoprazole, bisoprolol,<br>amlodipine, candesartan,<br>metformin, rosuvastatin,<br>liraglutide, empagliflozin,<br>ranolazine, aspirin. ISMN,<br>glycerol trinitrate and<br>paracetamol. |
| <b>TP-<br/>HSV039</b> | 47 | Male | White<br>British | Coronary artery disease | Heart attack, recent<br>infection-MSA.                        | No  | Aspirin,Atorvastatin, Bisoprolol,<br>Omeprazole, Ramipril, isosorbide<br>mononitrate and paracetamol                                                                                      |
| <b>TP-<br/>HSV040</b> | 65 | Male | White<br>British | Coronary artery disease | Aortic valve stenosis,<br>Asthma                              | No  | Bisoprolol, Enalapril, Simvastatin,<br>Allupurinol, Nifedipine and<br>Aspirin.                                                                                                            |

|                       |    |        |                  |                         |                                                                                                                  |     |                                                                                                                                                                    |
|-----------------------|----|--------|------------------|-------------------------|------------------------------------------------------------------------------------------------------------------|-----|--------------------------------------------------------------------------------------------------------------------------------------------------------------------|
| <b>TP-<br/>HSV041</b> | 63 | Male   | White<br>British | Coronary artery disease | T2DM, heart attack, total<br>hip replacement                                                                     | Yes | Aspirin, monomil, bisoprolol,<br>rosuvastatin and clopidogrel                                                                                                      |
| <b>TP-<br/>HSV042</b> | 69 | Male   | White<br>British | Coronary artery disease | Unstable angina, blood<br>cancer, larynthritis,<br>steoarthritis,<br>hypothyroidism,<br>hypertension, polythemia | No  | Aspirin, cinnarizine,<br>levothyroxine, solifenacin, ISMN,<br>bisoprolol and paracetamol                                                                           |
| <b>TP-<br/>HSV043</b> | 69 | Male   | White<br>British | Coronary artery disease | Borderline T2DM, eye<br>peripheral vision loss due<br>to embolus, COPD,<br>Hypercholesterolemia                  | Yes | Losartan, digoxin, bisoprolol,<br>simvastatin, elantin and Inipta                                                                                                  |
| <b>TP-<br/>HSV044</b> | 56 | Male   | White<br>British | Coronary artery disease | T2DM, Heart attack,<br>Asthma, left ventricular<br>hypertrophy and acute<br>coronary syndrome                    | Yes | Aspirin, allupurinol, bisoprolol,<br>atorvastatin, doxozosin,<br>indaprimed and ramipril                                                                           |
| <b>TP-<br/>HSV045</b> | 67 | Male   | White<br>British | Coronary artery disease | Hypercholesterolaemia                                                                                            | No  | Aspirin, atorvastatin, ramipril,<br>tramadol, paracetamol, and<br>oxycodone.                                                                                       |
| <b>TP-<br/>HSV046</b> | 72 | Female | White<br>British | Coronary artery disease | Steroid-induced T2DM,<br>Pancreatitis, chronic<br>anaemia, myasthenia gravis,<br>diverticulitis                  | Yes | Bisoprolol, Ezetimibe,<br>Fenofexadine, Folic acid,<br>Isosorbide mononitrate,<br>Lansoprazole, Linagliptin,<br>Losartan, Wicoradil,<br>Prednisolone, Methotrexate |
| <b>TP-<br/>HSV047</b> | 73 | Male   | White<br>British | Coronary artery disease | Hypertension,<br>Hypercholesterolaemia                                                                           | No  | Aspirin, Atorvastatin, Ferrous<br>fumarate, ISMN, Ramipril, GTN<br>Spray, Clopidogrel, Bisoprolol, and<br>Nirondil.                                                |

|                       |    |        |               |                                                  |                                                                                |     |                                                                                                                                          |
|-----------------------|----|--------|---------------|--------------------------------------------------|--------------------------------------------------------------------------------|-----|------------------------------------------------------------------------------------------------------------------------------------------|
| <b>TP-<br/>HSV048</b> | 73 | Male   | White         | Aortic valve stenosis and coronary heart disease | T2DM, Heart attack, Thrombocytopenia, Hypertension, and Gilbert's disease      | Yes | Aspirin, Atorvastatin, Doxazosin, Lisinopril, Metformin                                                                                  |
| <b>TP-<br/>HSV049</b> | 73 | Female | White         | Coronary artery disease                          | Kidney failure (CKD Stage 3A), Hypercholesterolaemia                           | No  | Aspirin, Amlodipine, Ezetimibe, Atorvastatin, cansoprazole, isorsobide mononitrate                                                       |
| <b>TP-<br/>HSV050</b> | 68 | Male   | White         | Coronary artery disease                          | Osteoarthritis, appendectomy, resection, tonsilectomy + aderoids and ex-smoker | No  | Aspirin, Bisoprolol, Rosuvastatin, Lansoprazole, Citalopram, ISMN                                                                        |
| <b>TP-<br/>HSV051</b> | 76 | Male   | White         | Coronary artery disease                          | Heart attack, Hypercholesterolaemia                                            | No  | Alfuzosin, Atorvastatin, and Oxybutynin                                                                                                  |
| <b>TP-<br/>HSV052</b> | 75 | Male   | White British | Coronary artery disease                          | T2DM                                                                           | Yes | Citalopram, Metformin, Nicorandil, Pravastatin, Aspirin, ISMN, Lansoprazole, Ramdazine, Nicorandil, Azithromycin, Salbutamol and Fostail |
| <b>TP-<br/>HSV053</b> | 69 | Female | White British | Coronary artery disease                          | T2DM                                                                           | Yes | Lansoprazole                                                                                                                             |
| <b>TP-<br/>HSV054</b> | 57 | Male   | Asian         | Coronary artery disease                          | Heart attack and hypercholesterolemia                                          | No  | Aspirin, Atorvastatin, Bisoprolol, Lansoprazole, Ramipril, Ranolazone, Codeine, Paracetamol, Resomni, and Mitazapine                     |
